# Supplementary material
Source: PubMed Central journal article supplement (PMC3587983)
Supplement: NIHMS426647-supplement-01.pdf [file NIHMS426647-supplement-01.pdf]

## SUPPLEMENTAL METHODS

### *Testicular Apoptotic Cell Analysis*

Testis sections were examined by a terminal deoxynucleotidyl transferase-mediated dUTP nick end labeling (TUNEL) assay (In situ cell death detection kit, Fluorescein, Roche Diagnostics, Mannheim, Germany) as per the manufacturer's protocols. Sections were deparaffinized and rehydrated. They were deproteinized by Proteinase K (20 mg/ml; Invitrogen, Carlsbad, CA) and then washed with PBS and then 25  $\mu$ l of the enzyme-label solution mix was applied on the testis sections and incubated at 37°C for 90 min. After PBS washes slides were mounted and kept at 4°C until examination in a fluorescent microscope in dark field. Both testis sections of each slide were microscopically examined to identify and to count apoptotic germ cells by their bright fluorescence.

### *Bioinformatic and Statistic Analyses of MeDIP-Chip Data*

For each comparative hybridization experiment raw data from both the Cy3 and Cy5 channels were imported into R (R Development Core Team (2010), R: A language for statistical computing, R Foundation for Statistical Computing, Vienna, Austria. ISBN 3-900051-07-0, URL <http://www.R-project.org>), checked for quality and converted to MA values ( $M = \text{Cy5} - \text{Cy3}$ ;  $A = (\text{Cy5} + \text{Cy3})/2$ ). The following normalization procedure was conducted. Within each array probes were separated into groups by GC content and each group was separately normalized between Cy3 and Cy5 using the loess normalization procedure. This allowed for GC groups to receive a normalization curve specific to that group. After each array was normalized within array, the arrays were then normalized across arrays using the A quantile normalization procedure. Following normalization each probe within each array was subjected to a smoothing procedure whereby the probe's normalized M values were replaced with the median value of all probe normalized M values across all arrays within a 600 bp window. If the number of probes present

in the window was less than 3 then no value was assigned to that probe. Each probe's A values were likewise smoothed using the same procedure. Following normalization and smoothing each probe's M value represents the median intensity difference between jet fuel F3 generation lineage and control F3 generation lineage of a 600 bp window. Significance was assigned to probe differences between jet fuel F3 generation lineage samples and control F3 generation lineage samples by calculating the median value of the intensity differences as compared to a normal distribution scaled to the experimental mean and standard deviation of the normalized M. A Z-score and P-value were computed for each probe from that distribution. The statistical analysis was performed in pairs of comparative IP hybridizations between jet fuel (J) and controls (C) (e.g. J1-C1 and J2-C2; J1-C1 and J3-C3; J2-C2 and J3-C3). In order to assure the reproducibility of the candidates obtained, only the candidates showing significant changes in all of the single paired comparisons were chosen as having a significant change in DNA methylation between jet fuel and control lineages. This is a stringent approach to select for changes because it only considers repeated changes in all paired analysis. Clustered Regions of interest were then determined by combining consecutive probes within 600 bases of each other and based on whether their mean M values were positive or negative with significance P-values less than  $10^{-5}$ . The statistically significant differential DNA methylated regions (DMR) were identified and a P-value associated with each region presented. Each region of interest was then annotated for gene and CpG content. This list was further reduced to those regions with an average intensity value exceeding 9.5 (log scale) and a CpG density  $\geq 1$  CpG/100 bp.

### **Supplemental Figure Legends**

**Supplemental Figure S1.** Testicular spermatogenic cell apoptosis as assessed by terminal deoxynucleotidyl transferase dUTP nick end labeling (TUNEL) in F1 and F3 generation control (open bars) and jet fuel lineage (closed bars) rats. Number of apoptotic germ cells were normalized to control means. No increase in spermatogenic cell apoptosis in jet fuel lineage rats was found.

Supplemental Figure S1

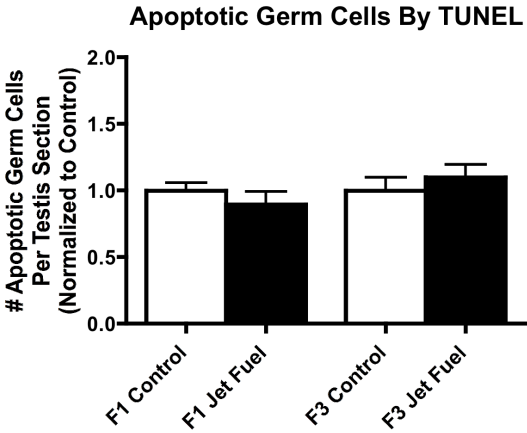

**Supplemental Table S1A.** Body weight and organ weights in F1 and F3 generation male rats of control and jet fuel lineages (mean ± standard error).

| Generation | Lineage  | Sex | Body Weight (grams) | Testis (% BW)      | Prostate (% BW)    | Sem. Vesicle (% BW) | Epididymis (% BW)  | Kidney (% BW)      |
|------------|----------|-----|---------------------|--------------------|--------------------|---------------------|--------------------|--------------------|
| F1         | Control  | M   | 545.3<br>± 8.66     | 0.7599<br>± 0.0154 | 0.2239<br>± 0.0076 | 0.1395<br>± 0.0092  | 0.2585<br>± 0.0045 | 0.3821<br>± 0.0092 |
| F1         | Jet fuel | M   | 553.1<br>± 16.21    | 0.7798<br>± 0.0374 | 0.2130<br>± 0.0077 | 0.1347<br>± 0.0081  | 0.2513<br>± 0.0084 | 0.3767<br>± 0.0083 |
| F3         | Control  | M   | 515.80<br>± 6.09    | 0.8153<br>± 0.0102 | 0.1970<br>± 0.0041 | 0.1330<br>± 0.0038  | 0.2628<br>± 0.0028 | 0.3791<br>± 0.0010 |
| F3         | Jet fuel | M   | 564.5***<br>± 10.58 | 0.7826<br>± 0.0265 | 0.2039<br>± 0.0085 | 0.1350<br>± 0.0062  | 0.2643<br>± 0.0090 | 0.3917<br>± 0.0012 |

Asterisks (\*\*\*) , if present, indicate statistically significant differences between means of control and jet fuel lineage rats (P<0.001). All animals were analyzed so n value as follows: F1 control male 22, F1 jet fuel male 12, F3 control male 56, and F3 jet fuel male 36.

**Supplemental Table S1B.** Body weight and organ weights in F1 and F3 generation female rats of control and jet fuel lineages (mean  $\pm$  standard error).

| Generation | Lineage  | Sex | Body Weight (grams)    | Ovaries (% BW)         | Uterus (% BW)          | Kidney (% BW)          |
|------------|----------|-----|------------------------|------------------------|------------------------|------------------------|
| F1         | Control  | F   | 310.9<br>$\pm$ 6.15    | 0.0532<br>$\pm$ 0.0032 | 0.2589<br>$\pm$ 0.0209 | 0.3276<br>$\pm$ 0.0127 |
| F1         | Jet fuel | F   | 302.4<br>$\pm$ 4.77    | 0.0464<br>$\pm$ 0.0023 | 0.3189<br>$\pm$ 0.0317 | 0.3522<br>$\pm$ 0.0063 |
| F3         | Control  | F   | 293.6<br>$\pm$ 2.31    | 0.0501<br>$\pm$ 0.0011 | 0.3883<br>$\pm$ 0.0150 | 0.3567<br>$\pm$ 0.0036 |
| F3         | Jet fuel | F   | 313.1***<br>$\pm$ 4.23 | 0.0509<br>$\pm$ 0.0018 | 0.3663<br>$\pm$ 0.0256 | 0.3498<br>$\pm$ 0.0053 |

Asterisks (\*\*\*) , if present, indicate statistically significant differences between means of control and jet fuel lineage rats ( $P < 0.001$ ). All animals were analyzed so n value as follows: F1 control female 20, F1 jet fuel female 19, F3 control female 69 and F3 jet fuel female 34.

**Supplemental Table S2A.** Individual disease incidence in F1 generation female rats of control and jet fuel lineages.

| Animal | Animal ID  | Sex | Age  | Puberty | PFL | PCO | Kidney | Tumor | Obesity | Total Disease |
|--------|------------|-----|------|---------|-----|-----|--------|-------|---------|---------------|
| C1     | DCS0-1-1-1 | F   | 1 Yr | -       | -   | -   | -      | -     | -       |               |
| C2     | DCS0-1-1-2 | F   | 1 Yr | -       |     |     | -      | -     | -       |               |
| C3     | DCS0-1-1-3 | F   | 1 Yr | -       |     |     | +      | -     | -       | 1             |
| C4     | DCR1-1-2-1 | F   | 1 Yr | -       | -   | -   | -      | -     | -       |               |
| C5     | DCR1-1-2-2 | F   | 1 Yr | -       |     |     | -      | -     | -       |               |
| C6     | DCR1-1-2-3 | F   | 1 Yr | -       |     |     |        | +     | -       | 1             |
| C7     | DCB1-1-3-1 | F   | 1 Yr | -       |     |     | -      | -     | -       |               |
| C8     | DCB1-1-3-2 | F   | 1 Yr | -       |     |     |        | -     | -       |               |
| C9     | DCF1-1-4-1 | F   | 1 Yr | -       | -   | -   | -      | +     | -       | 1             |
| C10    | DCF1-1-4-2 | F   | 1 Yr | -       | -   | -   | -      | -     | -       |               |
| C11    | DCF1-1-4-3 | F   | 1 Yr | -       | -   | -   | +      | -     | -       | 1             |
| C12    | DCL1-1-5-1 | F   | 1 Yr | -       | +   | -   | +      | -     | -       | 2             |
| C13    | DCL1-1-5-2 | F   | 1 Yr | -       |     |     | -      | -     | -       |               |
| C14    | DCL1-1-5-3 | F   | 1 Yr | -       | -   | -   | -      | -     | -       |               |
| C15    | DCM2-1-6-1 | F   | 1 Yr | -       | -   | -   | -      | -     | -       |               |
| C16    | DCM2-1-6-2 | F   | 1 Yr | +       |     |     | -      | -     | -       | 1             |
| C17    | DCM2-1-6-3 | F   | 1 Yr | +       | -   | -   | -      | -     | -       | 1             |
| C18    | DCF0-1-7-1 | F   | 1 Yr | -       |     |     | -      | -     | -       |               |
| C19    | DCF0-1-7-2 | F   | 1 Yr | -       |     |     | -      | -     | -       |               |
| C20    | DCF0-1-7-3 | F   | 1 Yr | -       |     |     | -      | -     | -       |               |
| J1     | DJT1-1-1-1 | F   | 1 Yr | +       | +   | +   | -      | -     | -       | 3             |
| J2     | DJT1-1-1-2 | F   | 1 Yr | +       | +   | +   | +      | -     | -       | 4             |
| J3     | DJT1-1-1-3 | F   | 1 Yr | +       | +   | +   | +      | -     | -       | 4             |

|     |             |   |      |   |   |   |   |   |   |   |
|-----|-------------|---|------|---|---|---|---|---|---|---|
| J4  | DJT1-1-1-4  | F | 1 Yr | + | + | + | + | - | - | 4 |
| J5  | DJT1-1-1-5  | F | 1 Yr | + | + | + | - | - | - | 3 |
| J6  | DJA0-1-2-1  | F | 1 Yr | - | + | + | + | - | - | 3 |
| J7  | DJA0-1-2-2  | F | 1 Yr | - |   |   |   | - | - |   |
| J8  | DJL2-1-3-1  | F | 1 Yr | - | + | + | - | - | - | 2 |
| J9  | DJL2-1-3-2  | F | 1 Yr | - |   |   |   | + | - | 1 |
| J10 | DJW0-1-4-1  | F | 1 Yr | - | + | + | + | - | - | 3 |
| J11 | DJW0-1-4-2  | F | 1 Yr | - | + | + | - | - | - | 2 |
| J12 | DJW0-1-4-3  | F | 1 Yr | - |   |   | - | - | - |   |
| J13 | DJZ2-1-5-1  | F | 1 Yr | - |   |   | + | - | - | 1 |
| J14 | DJZ2-1-5-2  | F | 1 Yr | - |   |   | + | - | - | 1 |
| J15 | DJZ2-1-5-3  | F | 1 Yr | - |   |   | + | - | - | 1 |
| J16 | DJZ2-1-5-4  | F | 1 Yr | - |   |   | + | - | - | 1 |
| J17 | DJZ2-1-5-5  | F | 1 Yr | - |   |   | - | - | - |   |
| J18 | DJZ2-1-5-6  | F | 1 Yr | - |   |   | + | - | - | 1 |
| J19 | DJZ2-1-5-12 | F | 1 Yr | - |   |   | - | - | - |   |

PFL – Primordial follicle loss; PCO- Polycystic ovaries; Animal IDs starting in DC indicate control lineage rats. Animal IDs starting in DJ indicate jet fuel lineage rats. The number of animals per litter (litter representation) mean  $\pm$  SEM used for each specific disease/abnormality was found not to be statistically different between the control versus jet fuel lineage animals.



**Supplemental Table S2 B.** Individual disease incidence in F1 generation male rats of control and jet fuel lineages.

| Animal | Animal ID   | Sex | Age  | Puberty | Testis | Prostate | Kidney | Tumor | Obesity | Total Disease |
|--------|-------------|-----|------|---------|--------|----------|--------|-------|---------|---------------|
| C1     | DCS0-1-1-5  | M   | 1 Yr | -       | +      | -        | -      | -     | -       | 1             |
| C2     | DCS0-1-1-6  | M   | 1 Yr | -       | -      | -        | -      | -     | -       |               |
| C3     | DCR1-1-2-5  | M   | 1 Yr | -       | -      | -        | -      | -     | -       |               |
| C4     | DCR1-1-2-6  | M   | 1 Yr | -       | -      | -        | -      | -     | -       |               |
| C5     | DCR1-1-2-7  | M   | 1 Yr | -       | -      | +        | -      | -     | -       | 1             |
| C6     | DCR1-1-2-8  | M   | 1 Yr | -       | -      | -        | -      | -     | -       |               |
| C7     | DCB1-1-3-3  | M   | 1 Yr | -       | +      | -        | -      | -     | -       | 1             |
| C8     | DCB1-1-3-4  | M   | 1 Yr | -       | -      | -        | -      | -     | -       |               |
| C9     | DCF1-1-4-6  | M   | 1 Yr | -       | -      | -        | -      | -     | -       |               |
| C10    | DCF1-1-4-7  | M   | 1 Yr | +       | -      | +        | -      | -     | -       | 2             |
| C11    | DCF1-1-4-8  | M   | 1 Yr | -       | -      | -        | -      | -     | -       |               |
| C12    | DCF1-1-4-9  | M   | 1 Yr | +       | -      | -        | -      | -     | -       | 1             |
| C13    | DCL1-1-5-6  | M   | 1 Yr | -       | -      | -        | -      | -     | -       |               |
| C14    | DCL1-1-5-7  | M   | 1 Yr | -       | -      | +        | -      | -     | -       | 1             |
| C15    | DCL1-1-5-8  | M   | 1 Yr | -       | -      | -        | -      | -     | -       |               |
| C16    | DCL1-1-5-9  | M   | 1 Yr | -       | -      | +        | -      | -     | -       | 1             |
| C17    | DCM2-1-6-7  | M   | 1 Yr | +       | -      | +        | -      | -     | -       | 2             |
| C18    | DCM2-1-6-9  | M   | 1 Yr | +       | +      | -        | -      | -     | -       | 2             |
| C19    | DCM2-1-6-10 | M   | 1 Yr | -       | +      | -        | -      | -     | -       | 1             |
| C20    | DCF0-1-7-5  | M   | 1 Yr | -       | -      | -        | -      | -     | -       |               |
| C21    | DCF0-1-7-6  | M   | 1 Yr | -       | -      | -        | +      | -     | -       | 1             |
| C22    | DCF0-1-7-7  | M   | 1 Yr | -       | -      | -        | -      | -     | -       |               |
| J1     | DJT1-1-1-6  | M   | 1 Yr | +       | -      | -        | -      | -     | -       | 1             |

|     |             |   |      |   |   |   |   |   |   |   |
|-----|-------------|---|------|---|---|---|---|---|---|---|
| J2  | DJA0-1-2-5  | M | 1 Yr | - | - | + | + | - | - | 2 |
| J3  | DJA0-1-2-7  | M | 1 Yr | + | - | + | + | - | - | 3 |
| J4  | DJA0-1-2-8  | M | 1 Yr | + | - | + | + | - | - | 3 |
| J5  | DJL2-1-3-7  | M | 1 Yr | - | - | + |   | - | - | 1 |
| J6  | DJL2-1-3-8  | M | 1 Yr | + | + | + | - | - | - | 3 |
| J7  | DJW0-1-4-5  | M | 1 Yr | - | - | - |   | - | - |   |
| J8  | DJW0-1-4-6  | M | 1 Yr | - | - | + |   | - | - | 1 |
| J9  | DJZ2-1-5-8  | M | 1 Yr | + | - | + | - | - | - | 2 |
| J10 | DJZ2-1-5-9  | M | 1 Yr | - | + | - | + | - | - | 2 |
| J11 | DJZ2-1-5-10 | M | 1 Yr | + |   | - | - | - | - | 1 |
| J12 | DJZ2-1-5-11 | M | 1 Yr | - |   | - | + | - | - | 1 |

Animal IDs starting in DC indicate control lineage rats; Animal IDs starting in DJ indicate jet fuel lineage rats. The number of animals per litter (litter representation) mean  $\pm$  SEM used for each specific disease/abnormality was found not to be statistically different between the control versus jet fuel lineage animals.

**Supplemental Table S3A** Individual disease incidence in F3 generation female rats of control and jet fuel lineages.

| Animal | Animal ID  | Sex | Age  | Puberty | PFL | PCO | Kidney | Tumor | Obesity | Total Disease |
|--------|------------|-----|------|---------|-----|-----|--------|-------|---------|---------------|
| C1     | DCF1-3-1-2 | F   | 1 Yr | -       |     |     | -      | -     | -       |               |
| C2     | DCF1-3-1-3 | F   | 1 Yr | -       |     |     | -      | -     | -       |               |
| C3     | DCF1-3-1-4 | F   | 1 Yr | -       |     |     | -      | -     | -       |               |
| C4     | DCF1-3-1-5 | F   | 1 Yr | -       |     |     |        | -     | -       |               |
| C5     | DCS0-3-2-2 | F   | 1 Yr | -       |     |     | -      | -     | -       |               |
| C6     | DCS0-3-2-3 | F   | 1 Yr | -       | -   | -   | -      | -     | -       |               |
| C7     | DCS0-3-2-4 | F   | 1 Yr | -       |     |     |        | -     | -       |               |
| C8     | DCS0-3-2-5 | F   | 1 Yr | -       |     |     |        | -     | -       |               |
| C9     | DCL1-3-3-2 | F   | 1 Yr | -       | -   | -   | +      | -     | -       | 1             |
| C10    | DCL1-3-3-3 | F   | 1 Yr | -       |     |     |        | +     | -       | 1             |
| C11    | DCB1-3-4-2 | F   | 1 Yr | -       |     |     | -      | -     | -       |               |
| C12    | DCB1-3-4-3 | F   | 1 Yr | -       |     |     | -      | -     | -       |               |
| C13    | DCB1-3-4-4 | F   | 1 Yr | -       |     |     | -      | -     | -       |               |
| C14    | DCB1-3-4-5 | F   | 1 Yr | -       | -   | -   |        | -     | -       |               |
| C15    | DCB1-3-4-6 | F   | 1 Yr | -       |     |     |        | -     | -       |               |
| C16    | DCS0-3-5-2 | F   | 1 Yr | -       |     |     | +      | -     | -       | 1             |
| C17    | DCS0-3-5-3 | F   | 1 Yr | -       |     |     | -      | -     | -       |               |
| C18    | DCS0-3-5-4 | F   | 1 Yr | -       |     |     | -      | -     | -       |               |
| C19    | DCS0-3-5-5 | F   | 1 Yr | -       |     |     | -      | -     | -       |               |
| C20    | DCS0-3-5-6 | F   | 1 Yr | -       | -   | -   |        | -     | -       |               |
| C21    | DCS0-3-6-2 | F   | 1 Yr | -       |     |     | +      | -     | -       | 1             |
| C22    | DCS0-3-6-3 | F   | 1 Yr | -       | +   | -   | -      | -     | -       | 1             |
| C23    | DCB1-3-7-2 | F   | 1 Yr | -       | -   | -   |        | -     | -       |               |
| C24    | DCB1-3-7-3 | F   | 1 Yr | -       |     |     | -      | -     | -       |               |

|        |             |     |       |         |     |     |        |       |         |               |
|--------|-------------|-----|-------|---------|-----|-----|--------|-------|---------|---------------|
| C25    | DCB1-3-7-4  | F   | 1 Yr  | -       |     |     |        | -     | -       |               |
| C26    | DCB1-3-7-5  | F   | 1 Yr  | -       |     |     |        | -     | -       |               |
| C27    | DCB1-3-7-6  | F   | 1 Yr  | -       |     |     |        | -     | -       |               |
| C28    | DCR1-3-8-2  | F   | 1 Yr  | -       | -   | -   |        | -     | -       |               |
| C29    | DCR1-3-8-3  | F   | 1 Yr  | -       |     |     | -      | -     | -       |               |
| C30    | DCR1-3-8-4  | F   | 1 Yr  | -       |     |     | -      | -     | -       |               |
| C31    | DCR1-3-8-5  | F   | 1 Yr  | -       |     |     |        | -     | -       |               |
| C32    | DCF1-3-9-2  | F   | 1 Yr  | -       | -   | -   |        | -     | -       |               |
| C33    | DCF1-3-9-3  | F   | 1 Yr  | -       |     |     | -      | -     | -       |               |
| C34    | DCF1-3-9-4  | F   | 1 Yr  | +       |     |     | -      | -     | -       | 1             |
| C35    | DCF1-3-9-5  | F   | 1 Yr  |         |     |     |        | -     | -       |               |
| C36    | DCB1-3-10-2 | F   | 1 Yr  | -       |     |     |        | -     | -       |               |
| C37    | DCB1-3-10-3 | F   | 1 Yr  | -       | -   | -   | -      | -     | -       |               |
| C38    | DCB1-3-10-4 | F   | 1 Yr  | -       |     |     | -      | -     | -       |               |
| C39    | DCL1-3-11-2 | F   | 10 m. | -       |     |     |        | +     | -       | 1             |
| C40    | DCL1-3-11-3 | F   | 1 Yr  | -       |     |     | -      | -     | -       |               |
| C41    | DCL1-3-11-4 | F   | 1 Yr  | -       |     |     | -      | -     | -       |               |
| Animal | Animal ID   | Sex | Age   | Puberty | PFL | PCO | Kidney | Tumor | Obesity | Total Disease |
| C42    | DCL1-3-11-5 | F   | 1 Yr  | -       |     |     | -      | -     | -       |               |
| C43    | DCL1-3-11-6 | F   | 1 Yr  | -       |     |     |        | -     | -       |               |
| C44    | DCL1-3-11-8 | F   | 11 m. | -       |     |     |        | +     | -       | 1             |
| C45    | DCB1-3-12-2 | F   | 1 Yr  | -       |     |     |        | -     | -       |               |
| C46    | DCB1-3-12-3 | F   | 1 Yr  | -       |     |     | -      | -     | -       |               |
| C47    | DCL1-3-13-1 | F   | 1 Yr  | -       |     |     | -      | -     | -       |               |
| C48    | DCL1-3-13-2 | F   | 1 Yr  | -       |     |     |        | -     | -       |               |
| C49    | DCL1-3-13-3 | F   | 1 Yr  | -       |     |     | -      | -     | -       |               |
| C50    | DCS0-3-14-2 | F   | 1 Yr  | -       |     |     |        | -     | -       |               |

---

|     |             |   |       |   |   |   |   |   |   |
|-----|-------------|---|-------|---|---|---|---|---|---|
| C51 | DCS0-3-14-3 | F | 1 Yr  | - | - | - | - | - |   |
| C52 | DCL1-3-15-2 | F | 1 Yr  | + | - | - | - | - | 1 |
| C53 | DCL1-3-15-3 | F | 1 Yr  | + | + | - | - | - | 2 |
| C54 | DCL1-3-15-4 | F | 1 Yr  | + | + | - | - | - | 2 |
| C55 | DCL1-3-15-5 | F | 1 Yr  | - | - | - | - | - |   |
| C56 | DCS0-3-16-2 | F | 1 Yr  | - | - | - | - | - |   |
| C57 | DCS0-3-16-3 | F | 1 Yr  | - | - | - | - | - |   |
| C58 | DCS0-3-16-4 | F | 1 Yr  | - | - | - | - | - |   |
| C59 | DCS0-3-16-5 | F | 1 Yr  | - | - | - | - | - |   |
| C60 | DCR1-3-17-1 | F | 1 Yr  | - | - | - | - | - |   |
| C61 | DCR1-3-17-2 | F | 1 Yr  | - | - | - | - | - |   |
| C62 | DCR1-3-17-3 | F | 1 Yr  | - | - | - | - | - |   |
| C63 | DCR1-3-17-4 | F | 1 Yr  | + | - | - | - | - | 1 |
| C64 | DCS0-3-18-2 | F | 1 Yr  | - | - | - | - | - |   |
| C65 | DCS0-3-18-3 | F | 1 Yr  | - | - | - | - | - |   |
| C66 | DCS0-3-18-4 | F | 1 Yr  | - | - | - | - | - |   |
| C67 | DCF1-3-19-1 | F | 1 Yr  | - | - | - | - | - |   |
| C68 | DCF1-3-19-2 | F | 1 Yr  | - | - | - | - | - |   |
| C69 | DCF1-3-19-3 | F | 11 m. | - | - | + | - | - | 1 |

---

|    |            |   |      |   |   |   |   |   |   |
|----|------------|---|------|---|---|---|---|---|---|
| J1 | DJL2-3-1-3 | F | 1 Yr | - | - | + | - | + | 2 |
| J2 | DJL2-3-1-4 | F | 1 Yr | - | - | - | - | - |   |
| J3 | DJL2-3-1-5 | F | 9 m. | - | - | - | - | - |   |
| J4 | DJZ2-3-3-4 | F | 1 Yr | - | - | - | - | - |   |

---

---

|     |             |   |       |   |   |   |   |   |   |   |
|-----|-------------|---|-------|---|---|---|---|---|---|---|
| J5  | DJZ2-3-3-5  | F | 1 Yr  | - |   |   | - | - | - |   |
| J6  | DJZ2-3-3-6  | F | 1 Yr  | + |   |   | - | - | - | 1 |
| J7  | DJA0-3-4-3  | F | 1 Yr  | - |   |   | - | - | - |   |
| J8  | DJA0-3-4-4  | F | 1 Yr  | - |   |   | - | - | - |   |
| J9  | DJA0-3-4-5  | F | 1 Yr  | - |   |   | - | - | - |   |
| J10 | DJW0-3-5-3  | F | 1 Yr  | - | - | + | - | - | - | 1 |
| J11 | DJT1-3-6-3  | F | 1 Yr  | - | + | + | - | - | - | 2 |
| J12 | DJL2-3-7-3  | F | 1 Yr  | - | + | + | - | - | - | 2 |
| J13 | DJA0-3-8-3  | F | 1 Yr  | - | + | + | - | - | - | 2 |
| J14 | DJA0-3-8-4  | F | 1 Yr  | - |   |   | - | - | - |   |
| J15 | DJA0-3-8-5  | F | 1 Yr  | - |   |   | - | - | - |   |
| J16 | DJA0-3-8-6  | F | 1 Yr  | - |   |   | - | - | - |   |
| J17 | DJZ2-3-9-3  | F | 1 Yr  | - | + | + | - | - | - | 2 |
| J18 | DJZ2-3-9-4  | F | 1 Yr  |   |   |   | - | - | - |   |
| J19 | DJZ2-3-9-5  | F | 1 Yr  |   |   |   | + | - | - | 1 |
| J20 | DJZ2-3-9-6  | F | 10 m. |   |   |   |   | + | - | 1 |
| J21 | DJZ2-3-10-1 | F | 1 Yr  | - | + | + | - | + | - | 3 |
| J22 | DJZ2-3-10-2 | F | 1 Yr  | - |   |   | - | - | - |   |
| J23 | DJZ2-3-10-3 | F | 1 Yr  | - |   |   | + | - | - | 1 |
| J24 | DJZ2-3-10-4 | F | 1 Yr  | - |   |   |   | - | - |   |
| J25 | DJL2-3-11-1 | F | 1 Yr  | + |   |   | + | - | + | 3 |
| J26 | DJL2-3-11-2 | F | 1 Yr  | + |   |   | - | - | + | 2 |
| J27 | DJL2-3-11-3 | F | 1 Yr  | + | + | + | - | - | + | 4 |
| J28 | DJL2-3-11-4 | F | 1 Yr  | + |   |   |   | - | - | 1 |
| J29 | DJL2-3-11-5 | F | 1 Yr  | - |   |   |   | - | - |   |
| J30 | DJA0-2-12-2 | F | 1 Yr  | - |   |   | - | - | - |   |
| J31 | DJA0-3-12-3 | F | 1 Yr  | - |   |   | - | - | - |   |
| J32 | DJA0-3-12-4 | F | 1 Yr  | - | - | + | - | - | - | 1 |

---

---

|     |             |   |      |   |   |   |   |
|-----|-------------|---|------|---|---|---|---|
| J33 | DJA0-3-12-5 | F | 1 Yr | - | + | - | 1 |
| J34 | DJAO-3-12-7 | F | 1 Yr | - | + | - | 1 |

---

PFL – Primordial follicle loss; PCO- Polycystic ovaries; Animal IDs starting in DC indicate control lineage rats. Animal IDs starting in DJ indicate jet fuel lineage rats. The number of animals per litter (litter representation) mean  $\pm$  SEM used for each specific disease/abnormality was found not to be statistically different between the control versus jet fuel lineage animals.

**Supplemental Table 3S B.** Individual disease incidence in F3 generation male rats of control and jet fuel lineages.

| Animal | Animal ID   | Sex | Age  | Puberty | Testis | Prostate | Kidney | Tumor | Obesity | Total Disease |
|--------|-------------|-----|------|---------|--------|----------|--------|-------|---------|---------------|
| C1     | DCF1-3-1-8  | M   | 1 Yr | -       | +      |          | -      | -     | -       | 1             |
| C2     | DCF1-3-1-9  | M   | 1 Yr | -       |        | -        | -      | -     | -       |               |
| C3     | DCF1-3-1-10 | M   | 1 Yr | -       |        | -        | +      | -     | -       | 1             |
| C4     | DCS0-3-2-11 | M   | 1 Yr | -       | -      | -        | -      | -     | -       |               |
| C5     | DCS0-3-2-12 | M   | 1 Yr | -       | -      | -        | -      | -     | -       |               |
| C6     | DCS0-3-2-13 | M   | 1 Yr | -       | -      |          | -      | -     | -       |               |
| C7     | DCL1-3-3-6  | M   | 1 Yr | -       | -      | -        |        | -     | -       |               |
| C8     | DCL1-3-3-7  | M   | 1 Yr | -       | -      | -        |        | -     | -       |               |
| C9     | DCB1-3-4-9  | M   | 1 Yr | -       | -      | +        | -      | -     | -       | 1             |
| C10    | DCB1-3-4-10 | M   | 1 Yr | -       | -      | -        | -      | -     | -       |               |
| C11    | DCB1-3-4-11 | M   | 1 Yr | -       | -      | -        | -      | -     | -       |               |
| C12    | DCB1-3-4-12 | M   | 1 Yr | -       |        |          |        | -     | -       |               |
| C13    | DCB1-3-4-13 | M   | 1 Yr | -       |        |          |        | -     | -       |               |
| C14    | DCS0-3-5-9  | M   | 1 Yr | -       | -      |          | -      | -     | -       |               |
| C15    | DCS0-3-5-10 | M   | 1 Yr | -       | -      | -        | -      | -     | -       |               |
| C16    | DCS0-3-5-11 | M   | 1 Yr | -       | -      | -        | -      | -     | -       |               |
| C17    | DCS0-3-6-6  | M   | 1 Yr | -       | -      |          | -      | -     | -       |               |
| C18    | DCS0-3-6-7  | M   | 1 Yr | -       | -      | -        | -      | -     | -       |               |
| C19    | DCS0-3-6-8  | M   | 1 Yr | -       | +      | -        | -      | -     | -       | 1             |
| C20    | DCB1-3-7-9  | M   | 1 Yr | -       | -      |          | +      | -     | -       | 1             |
| C21    | DCB1-3-7-10 | M   | 1 Yr | -       | -      | -        | -      | -     | -       |               |
| C22    | DCB1-3-7-11 | M   | 1 Yr | -       | -      | -        | -      | -     | -       |               |
| C23    | DCR1-3-8-7  | M   | 1 Yr | -       | -      | -        | -      | -     | -       |               |
| C24    | DCR1-3-8-8  | M   | 1 Yr | -       | -      | -        | -      | -     | -       |               |



---

|     |              |   |       |   |   |   |   |   |   |   |
|-----|--------------|---|-------|---|---|---|---|---|---|---|
| C25 | DCF1-3-9-11  | M | 1 Yr  | - | - | - | - | - | - |   |
| C26 | DCF1-3-9-12  | M | 1 Yr  | - | - | - | - | - | - |   |
| C27 | DCF1-3-9-13  | M | 1 Yr  | + | - | - | - | - | - | 1 |
| C28 | DCB1-3-10-9  | M | 9 m.  | - | - | - | - | + | - | 1 |
| C29 | DCB1-3-10-10 | M | 1 Yr  | - | - | - | - | - | - |   |
| C30 | DCB1-3-10-11 | M | 1 Yr  | - | - | - | - | - | - |   |
| C31 | DCB1-3-10-12 | M | 1 Yr  | - | + | - | - | - | - | 1 |
| C32 | DCB1-3-10-13 | M | 11 m. | - | - | - | - | + | - | 1 |
| C33 | DCL1-3-11-9  | M | 1 Yr  | - | - | - | - | - | - |   |
| C34 | DCL1-3-11-10 | M | 1 Yr  | - | - | + | - | - | - | 1 |
| C35 | DCL1-3-11-11 | M | 1 Yr  | - | - | - | - | - | - |   |
| C36 | DCB1-3-12-6  | M | 1 Yr  | - | - | - | - | - | - |   |
| C37 | DCB1-3-12-7  | M | 1 Yr  | - | + | + | - | - | - | 2 |
| C38 | DCB1-3-12-8  | M | 1 Yr  | - | + | - | - | - | - | 1 |
| C39 | DCL1-3-13-4  | M | 1 Yr  | - | - | - | - | - | - |   |
| C40 | DCS0-3-14-5  | M | 1 Yr  | - | - | - | - | - | - |   |
| C41 | DCS0-3-14-6  | M | 1 Yr  | - | - | - | - | - | - |   |
| C42 | DCS0-3-14-7  | M | 1 Yr  | - | - | - | - | - | - |   |
| C43 | DCL1-3-15-7  | M | 1 Yr  | + | - | - | - | - | - | 1 |
| C44 | DCL1-3-15-8  | M | 1 Yr  | + | - | + | - | - | - | 2 |
| C45 | DCL1-3-15-9  | M | 1 Yr  | + | - | - | - | - | - | 1 |
| C46 | DCS0-3-16-9  | M | 1 Yr  | - | - | - | - | - | - |   |
| C47 | DCS0-3-16-10 | M | 1 Yr  | - | - | - | - | - | - |   |
| C48 | DCS0-3-16-11 | M | 1 Yr  | - | - | - | - | - | - |   |
| C49 | DCS0-3-16-13 | M | 1 Yr  | - | - | - | - | - | - |   |
| C50 | DCR1-3-17-6  | M | 1 Yr  | - | - | - | - | - | - |   |
| C51 | DCS0-3-18-10 | M | 1 Yr  | - | - | - | + | - | - | 1 |
| C52 | DCS0-3-18-11 | M | 1 Yr  | - | + | - | + | - | - | 2 |

---

|     |              |   |      |   |   |   |   |   |   |
|-----|--------------|---|------|---|---|---|---|---|---|
| C53 | DCS0-3-18-12 | M | 1 Yr | - | - | - | - | - | - |
| C54 | DCF1-3-19-4  | M | 1 Yr | - | - | - | - | - | - |
| C55 | DCF1-3-19-5  | M | 1 Yr | - | - | - | - | - | - |
| C56 | DCF1-3-19-6  | M | 1 Yr | - | - | - | - | - | - |

| Animal | Animal ID   | Sex | Age  | Puberty | Testis | Prostate | Kidney | Tumor | Obesity | Total Disease |
|--------|-------------|-----|------|---------|--------|----------|--------|-------|---------|---------------|
| J1     | DJL2-3-1-8  | M   | 1 Yr | -       | -      | -        | -      | -     | -       |               |
| J2     | DJL2-3-1-9  | M   | 1 Yr | -       | -      | -        | -      | -     | -       |               |
| J3     | DJL2-3-1-10 | M   | 1 Yr | -       | -      | -        | -      | -     | +       | 1             |
| J4     | DJZ2-3-2-3  | M   | 1 Yr | -       | -      | -        | -      | -     | -       |               |
| J5     | DJZ2-3-3-11 | M   | 1 Yr | -       | -      | -        | -      | -     | -       |               |
| J6     | DJZ2-3-3-13 | M   | 1 Yr | -       | -      | -        | -      | -     | -       |               |
| J7     | DJZ2-3-3-14 | M   | 1 Yr | -       | -      | -        | -      | -     | -       |               |
| J8     | DJW0-3-5-6  | M   | 1 Yr | -       | -      | -        | -      | -     | -       |               |
| J9     | DJW0-3-5-7  | M   | 1 Yr | -       | -      | -        | -      | -     | -       |               |
| J10    | DJW0-3-5-8  | M   | 1 Yr | -       | -      | -        | -      | -     | -       |               |
| J11    | DJT1-3-6-7  | M   | 1 Yr | -       | +      | -        | -      | -     | -       | 1             |
| J12    | DJT1-3-6-8  | M   | 1 Yr | -       | +      | +        | -      | -     | -       | 2             |
| J13    | DJT1-3-6-9  | M   | 1 Yr | -       | -      | +        | -      | -     | +       | 2             |
| J14    | DJT1-3-6-10 | M   | 1 Yr | -       | -      | -        | -      | -     | -       |               |
| J15    | DJL2-3-7-7  | M   | 1 Yr | -       | -      | -        | -      | -     | -       |               |
| J16    | DJL2-3-7-8  | M   | 1 Yr | -       | +      | -        | -      | -     | -       | 1             |
| J17    | DJL2-3-7-9  | M   | 1 Yr | -       | -      | -        | -      | -     | -       |               |
| J18    | DJA0-3-8-10 | M   | 1 Yr | -       | -      | -        | -      | -     | +       | 1             |
| J19    | DJA0-3-8-11 | M   | 1 Yr | -       | -      | -        | -      | -     | -       |               |
| J20    | DJA0-3-8-12 | M   | 1 Yr | -       | -      | +        | -      | -     | -       | 1             |

|     |              |   |       |   |   |   |   |   |   |   |
|-----|--------------|---|-------|---|---|---|---|---|---|---|
| J21 | DJZ2-3-9-9   | M | 10 m. | - |   |   |   | - | - |   |
| J22 | DJZ2-3-9-10  | M | 1 Yr  | - | + | - | - | - | - | 1 |
| J23 | DJZ2-3-9-11  | M | 1 Yr  | - | + | - | - | - | - | 1 |
| J24 | DJZ2-3-9-12  | M | 1 Yr  | - | - |   | - | - | - |   |
| J25 | DJZ2-3-10-6  | M | 1 Yr  | - | + | + | - | - | - | 2 |
| J26 | DJZ2-3-10-7  | M | 1 Yr  | - | - | + | - | - | + | 2 |
| J27 | DJZ2-3-10-8  | M | 1 Yr  | - | - | - | - | - | - |   |
| J28 | DJZ2-3-10-9  | M | 8 m.  | - |   |   | - | - | - |   |
| J29 | DJL2-3-11-6  | M | 1 Yr  | + | + | - | - | - | - | 2 |
| J30 | DJL2-3-11-7  | M | 1 Yr  | - | + | + | - | - | - | 2 |
| J31 | DJL2-3-11-8  | M | 1 Yr  | - | - | - |   | - | - |   |
| J32 | DJL2-3-11-9  | M | 1 Yr  | - | - | - | - | - | + | 1 |
| J33 | DJA0-3-12-9  | M | 1 Yr  | - |   | - | - | - | - |   |
| J34 | DJA0-3-12-10 | M | 1 Yr  | + | - | - | - | - | - | 1 |
| J35 | DJA0-3-12-11 | M | 1 Yr  | - | - | + | - | - | - | 1 |
| J36 | DJA0-3-12-12 | M | 1 Yr  | + |   |   |   | - | + | 2 |

Animal IDs starting in DC indicate control lineage rats; Animal IDs starting in DJ indicate jet fuel group rats. The number of animals per litter (litter representation) mean  $\pm$  SEM used for each specific disease/abnormality was found not to be statistically different between the control versus jet fuel lineage animals.
